# Supplementary material
Source: PubMed Central journal article supplement (PMC7916999)

Source Data – Extended Data Figure 1i

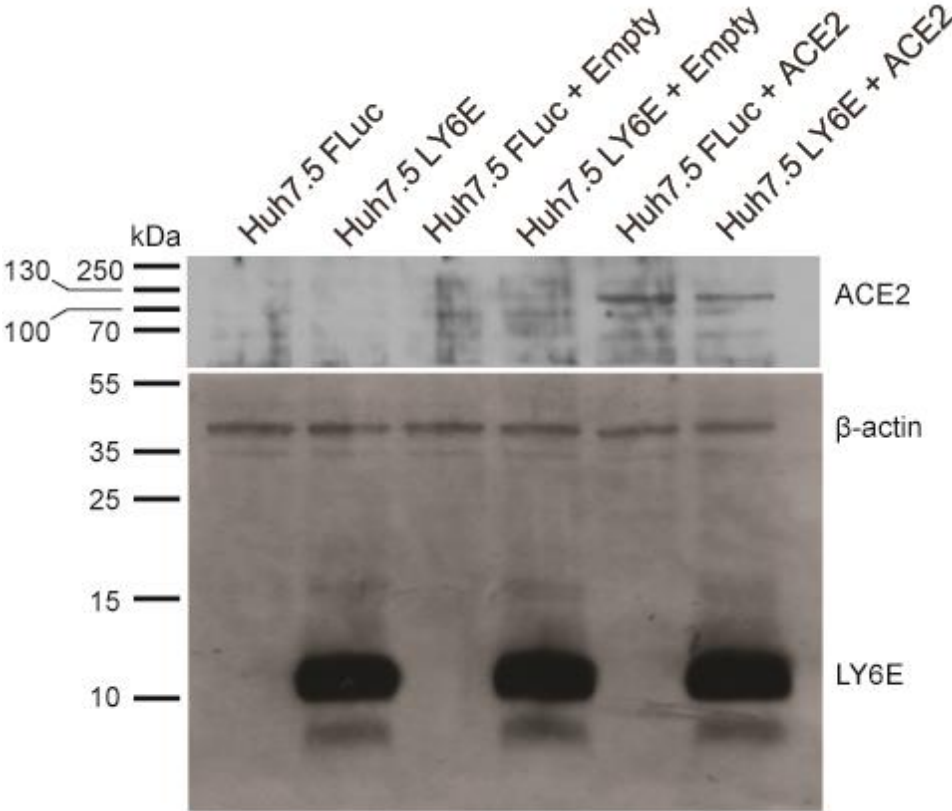

Supplement: NIHMS1609238-supplement-1609238_SourceDataExtDataFig1.pdf [file NIHMS1609238-supplement-1609238_SourceDataExtDataFig1.pdf]

Source Data – Extended Data Figure 4e

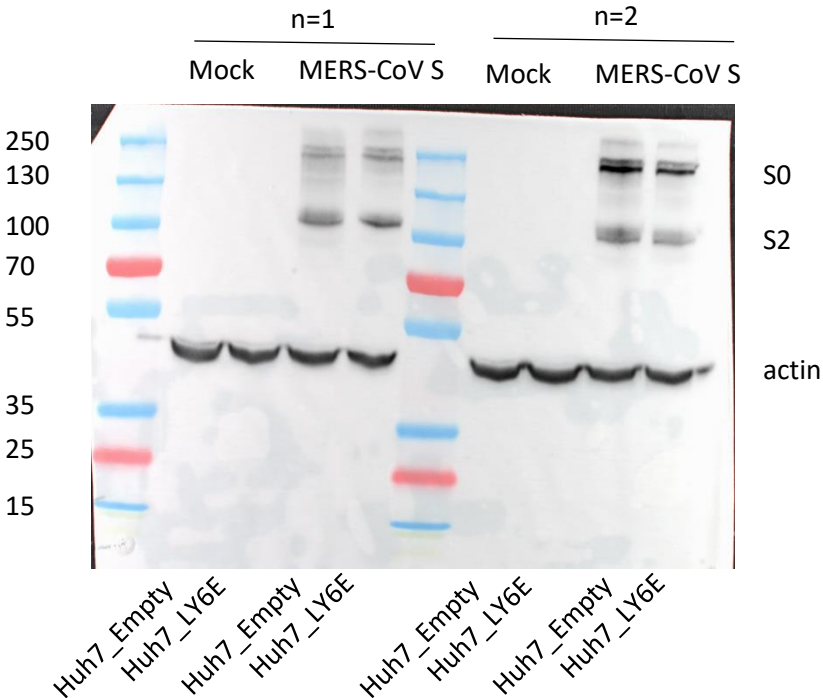

Supplement: NIHMS1609238-supplement-1609238_SourceDataExtDataFig4.pdf [file NIHMS1609238-supplement-1609238_SourceDataExtDataFig4.pdf]

Source Data – Figure 1m

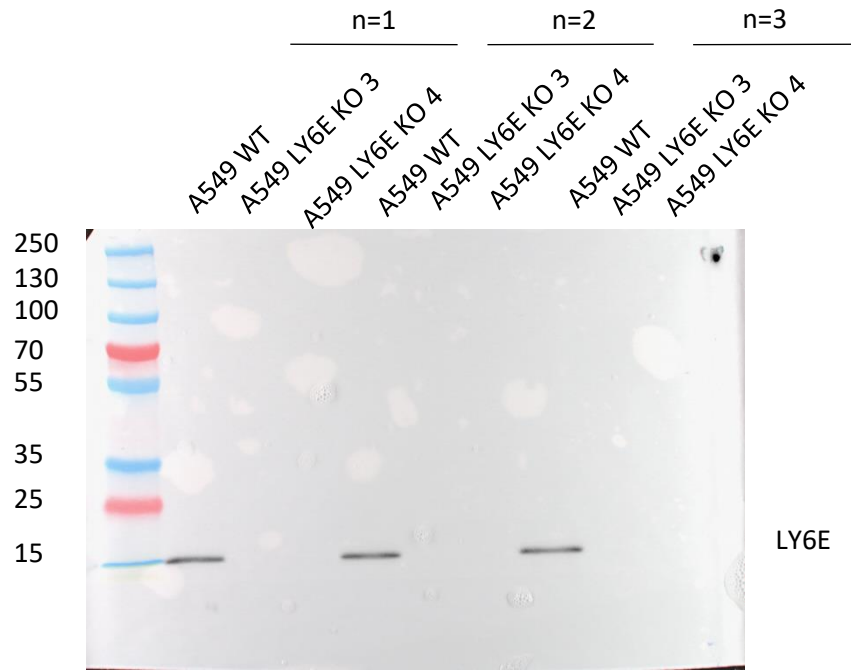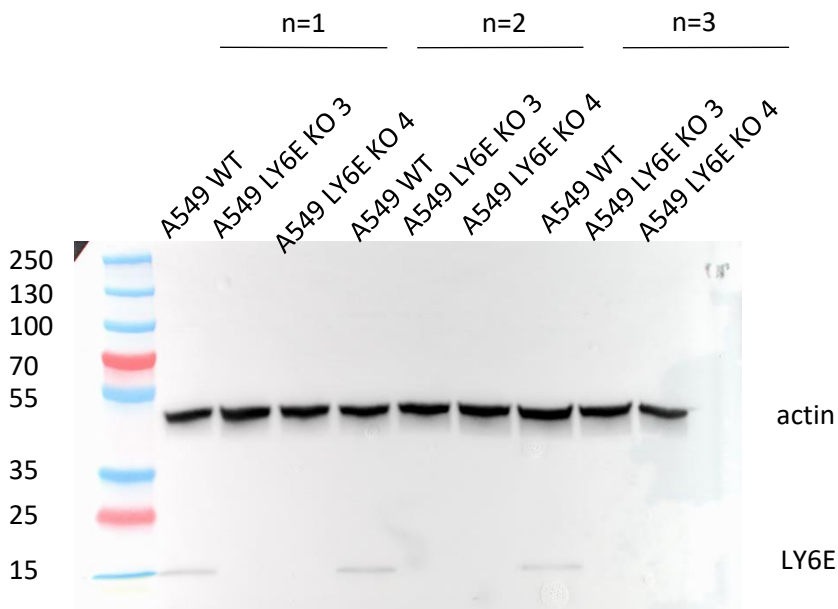

Source Data – Figure 1o

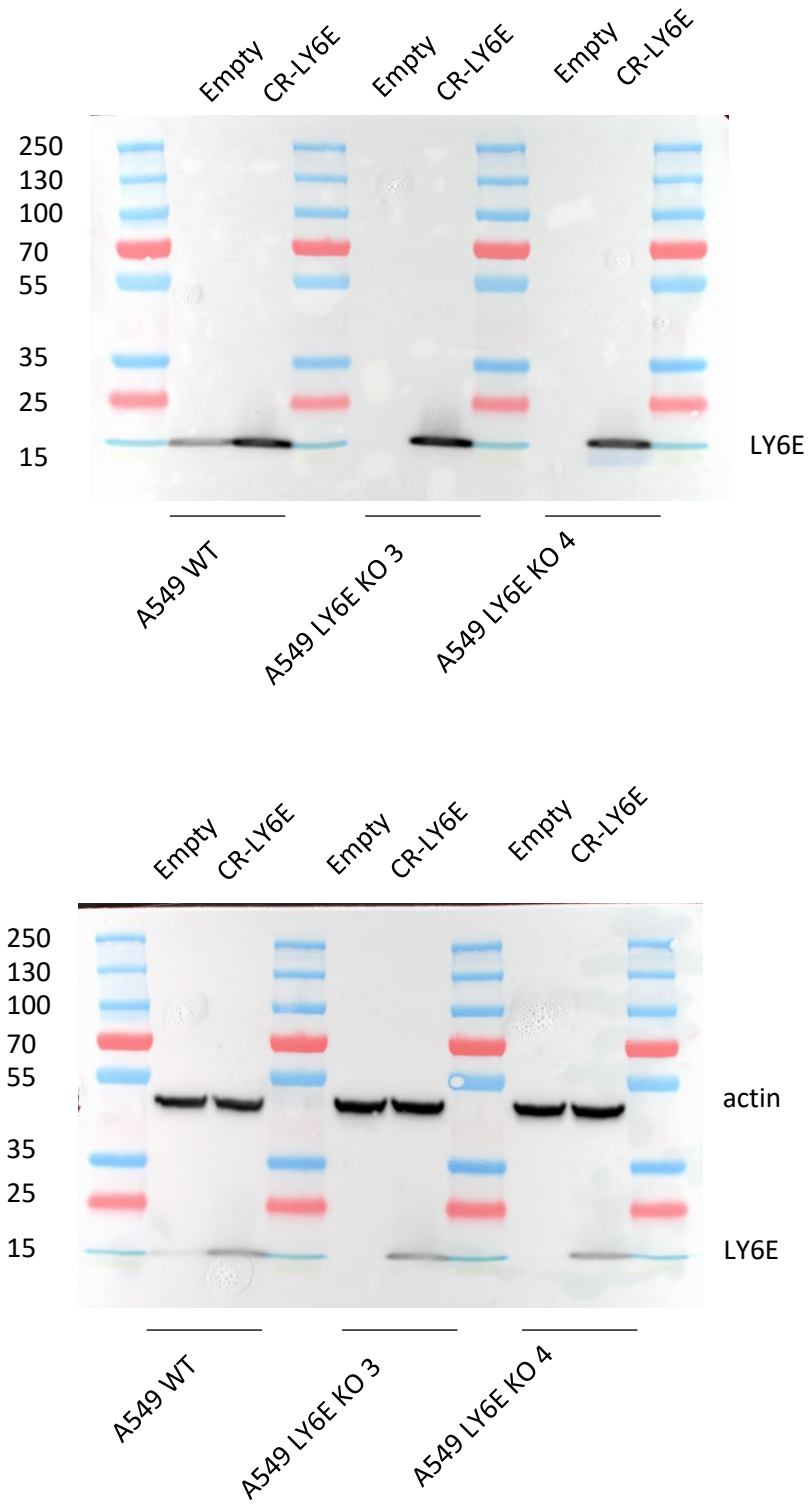

Supplement: NIHMS1609238-supplement-1609238_SourceDataFig1.pdf [file NIHMS1609238-supplement-1609238_SourceDataFig1.pdf]
